# Supplementary material for: Serum exosomal microRNAs combined with alpha‐fetoprotein as diagnostic markers of hepatocellular carcinoma
Source: PubMed Central journal article supplement (PMC5943469; doi:10.1002/cam4.1390), 2018-03-23

Fig. S1

**A**

Pearson correlation: 0.9844

● Up-regulation (23)

● Down-regulation (168)

● Not differential expressed (1048)

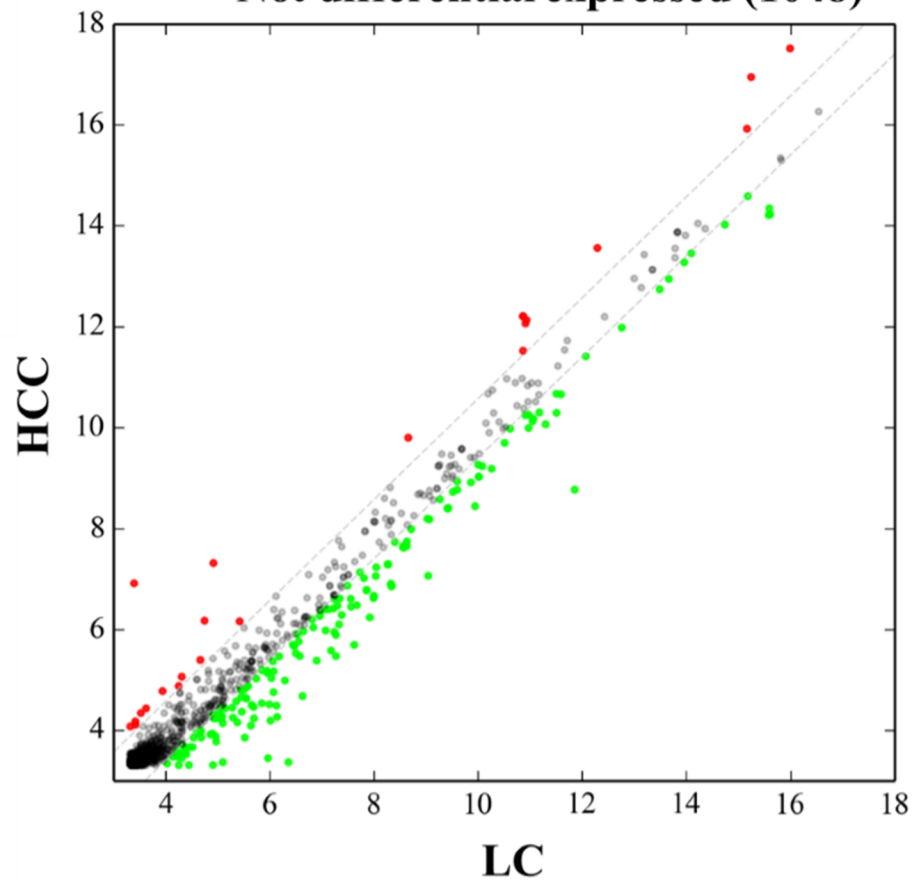

**B**

● Up-regulation (11)

● Down-regulation (81)

● Not differential expressed (1147)

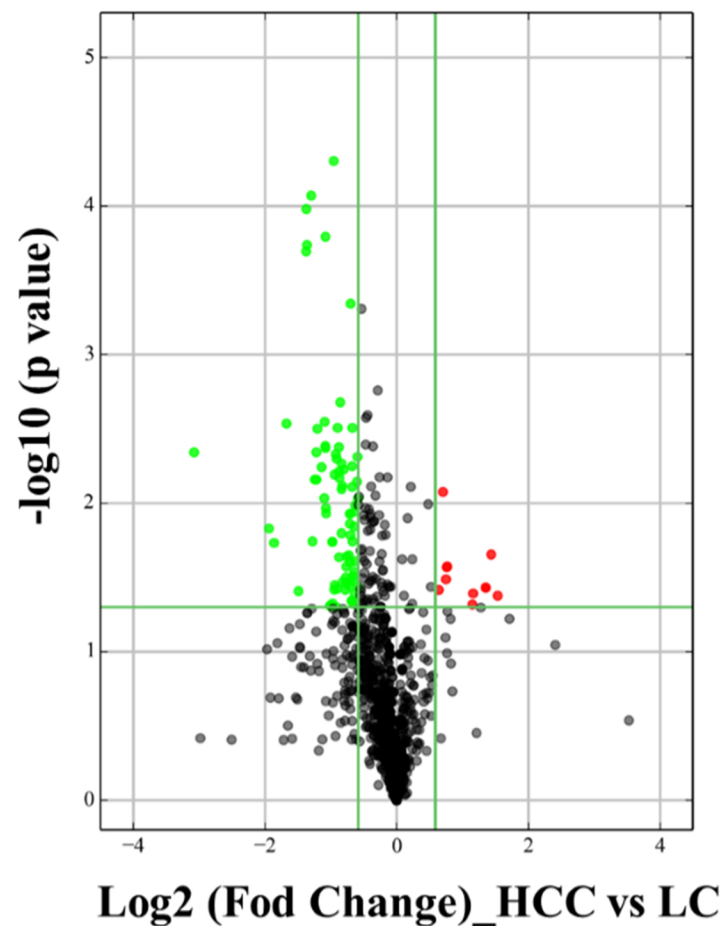

Fig. S2

**A**

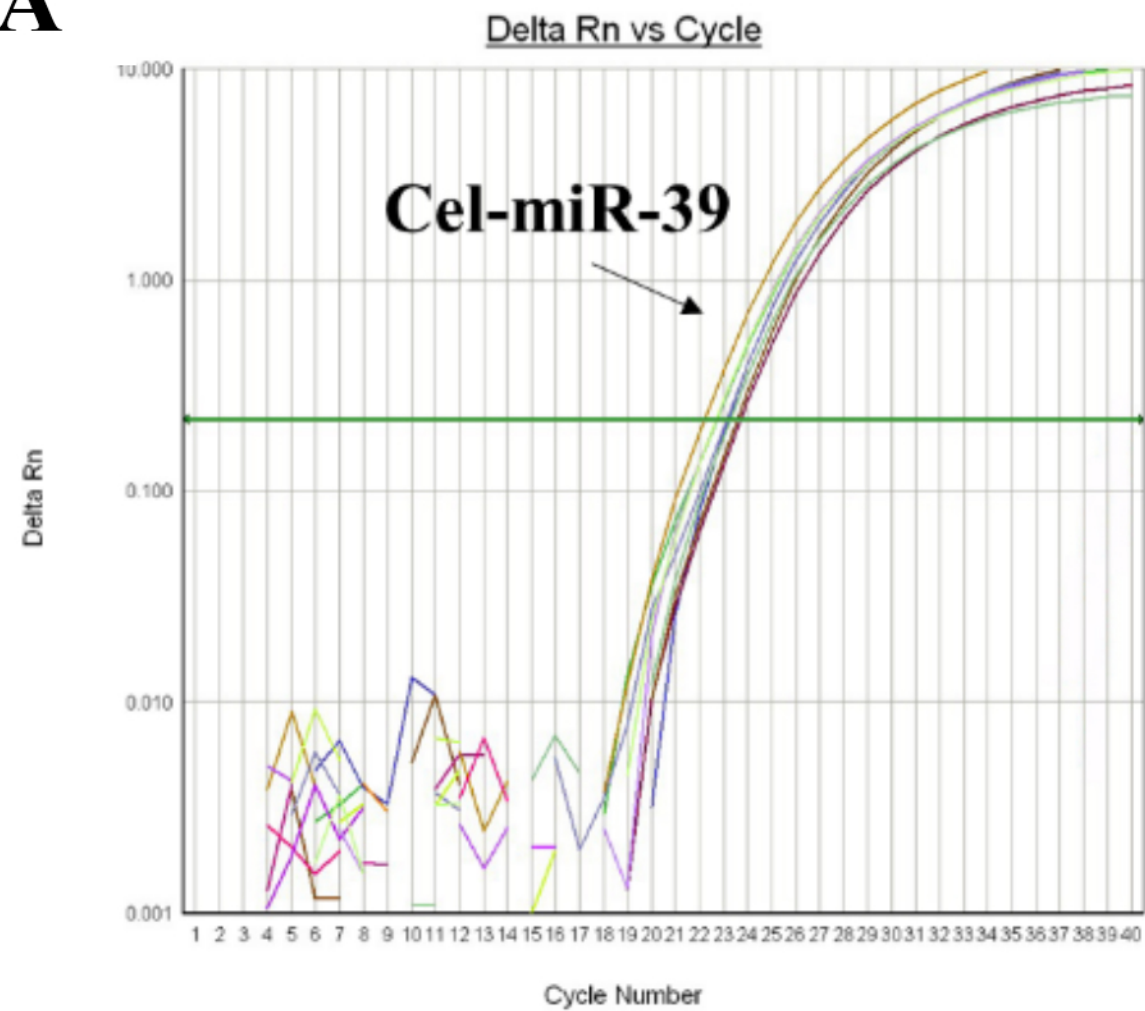

**B**

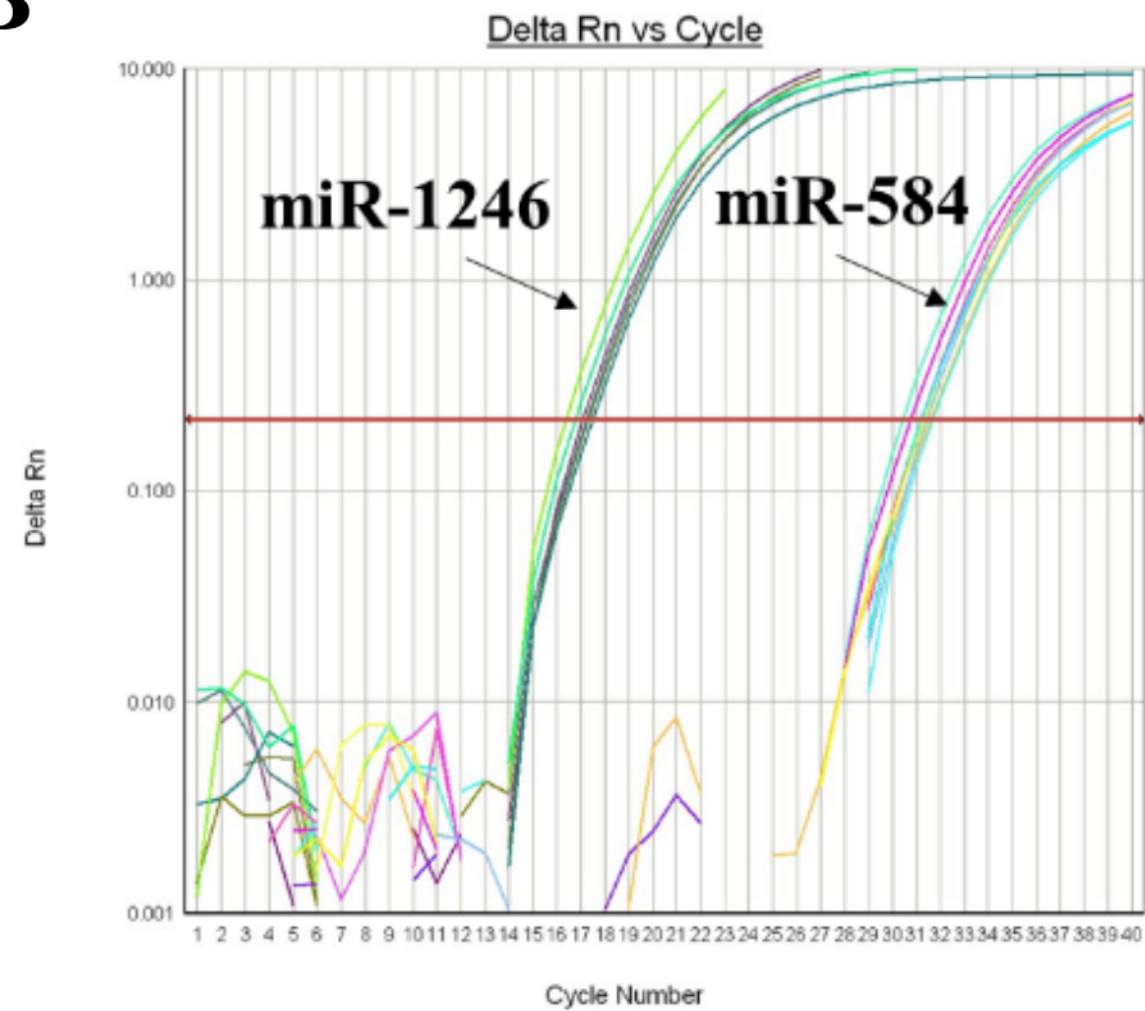

**A**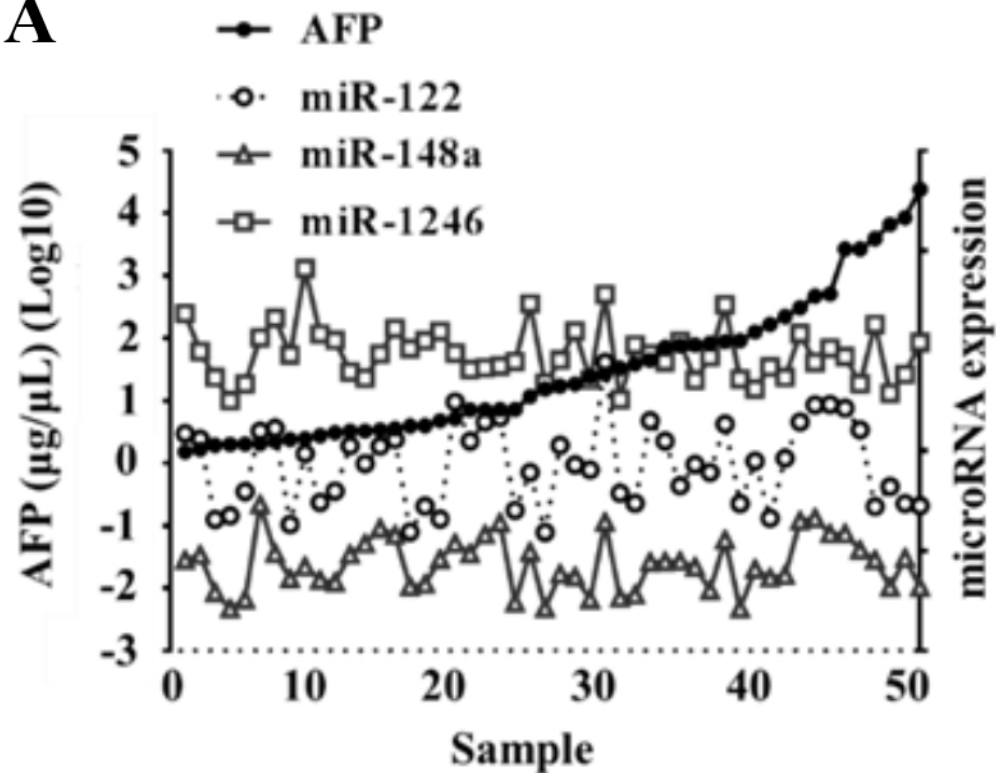**B**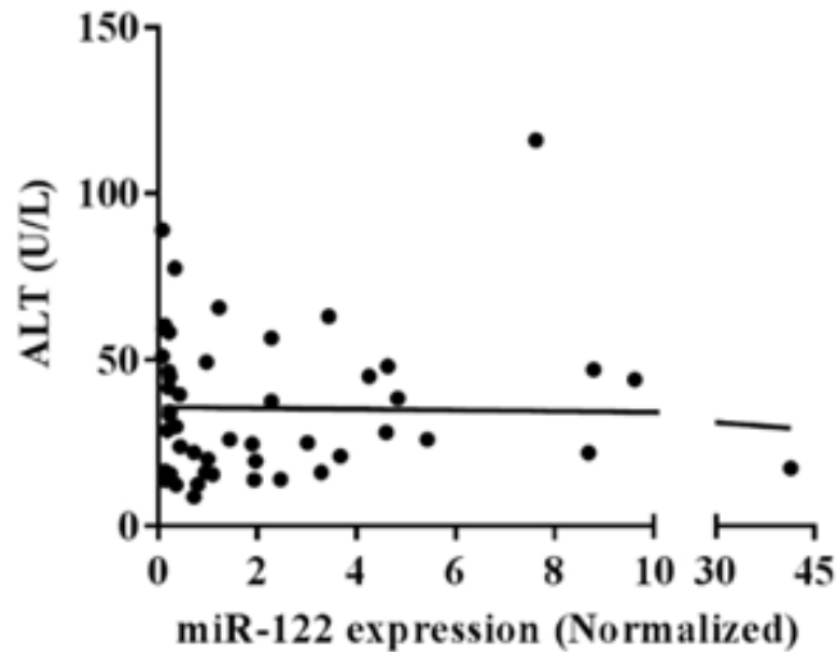

Supplement: CAM4-7-1670-s001.pdf [file CAM4-7-1670-s001.pdf]
